# Supplementary material for: Competing Risks Model for Prediction of Small for Gestational Age Neonates and the Role of Second Trimester Soluble Fms-like Tyrosine Kinase-1
Source: MDPI journal article supplement (doi:10.3390/jcm10173786), 2021-08-24
Supplement: s1 [file s1]

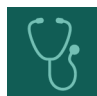

**Table S1.** Comparison of detection rate of SGA (<10th percentile or <3rd percentile), with delivery at <37 and ≥37 weeks weeks' gestation, of different methods of screening at a fixed false positive rate of 10%.

| Method of screening            | N    | Comparison of detection<br>by the two<br>methods of screening<br><i>n</i> (%) vs. <i>n</i> (%) | Difference in detection<br>between the two<br>methods of screening<br><i>n</i> (%; 95% CI) | <i>p</i> -value |
|--------------------------------|------|------------------------------------------------------------------------------------------------|--------------------------------------------------------------------------------------------|-----------------|
| <b>≥37 weeks</b>               |      |                                                                                                |                                                                                            |                 |
| <b>SGA &lt;10th percentile</b> |      |                                                                                                |                                                                                            |                 |
| MF vs MF+sFlt-1/PlGF           | 4014 | 1268 (31.6) vs. 1212 (30.2)                                                                    | -56 (-1.4; -1.8 to -1)                                                                     | <0.0001         |
| MF+PlGF vs MF+sFlt-1/PlGF      | 4014 | 1337 (33.3) vs. 1212 (30.2)                                                                    | -125 (-3.1; -3.6 to -2.6)                                                                  | <0.0001         |
| <b>SGA &lt;3rd percentile</b>  |      |                                                                                                |                                                                                            |                 |
| MF vs MF+sFlt-1/PlGF           | 1462 | 547 (37.4) vs. 542 (37.1)                                                                      | -5 (-0.3; -0.6 to -0.02)                                                                   | 0.4235          |
| MF+PlGF vs MF+sFlt-1/PlGF      | 1462 | 594 (40.6) vs. 542 (37.1)                                                                      | -52 (-3.5; -4.4 to -2.6)                                                                   | 0.00167         |
| <b>&lt;37 weeks</b>            |      |                                                                                                |                                                                                            |                 |
| <b>SGA &lt;10th percentile</b> |      |                                                                                                |                                                                                            |                 |
| MF vs MF+sFlt-1/PlGF           | 759  | 275 (36.2) vs. 304 (40.1)                                                                      | 29 (3.9; 2.5 to 5.3)                                                                       | 0.017           |
| MF+PlGF vs MF+sFlt-1/PlGF      | 759  | 344 (45.3) vs. 304 (40.1)                                                                      | -40 (-5.2; -6.8 to -3.6)                                                                   | 0.00017         |
| <b>SGA &lt;3rd percentile</b>  |      |                                                                                                |                                                                                            |                 |
| MF vs MF+sFlt-1/PlGF           | 475  | 176 (37.1) vs. 201 (42.3)                                                                      | 25 (5.2; 3.2 to 7.2)                                                                       | 0.025           |
| MF+PlGF vs MF+sFlt-1/PlGF      | 475  | 244 (51.4) vs. 201 (42.3)                                                                      | -43 (-9.1; -11.7 to -6.5)                                                                  | <0.0001         |

SGA, Small for gestational age; MF, maternal factors; sFlt-1, Serum Soluble fms-like tyrosine kinase-1; PlGF, Placental Growth factor.
